# Supplementary material for: A chemical kinetics theory for interpreting the non-monotonic temperature dependence of enzymatic reactions
Source: Copernicus journal article supplement (doi:10.5194/bg-21-1061-2024), 2024-03-04
Supplement: Supplementary file 1 [file bg-21-1061-2024-supplement.pdf]

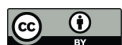

*Supplement of*

## **A chemical kinetics theory for interpreting the non-monotonic temperature dependence of enzymatic reactions**

**Jinyun Tang and William J. Riley**

*Correspondence to:* Jinyun Tang ([jinyuntang@lbl.gov](mailto:jinyuntang@lbl.gov))

The copyright of individual parts of the supplement might differ from the article licence.

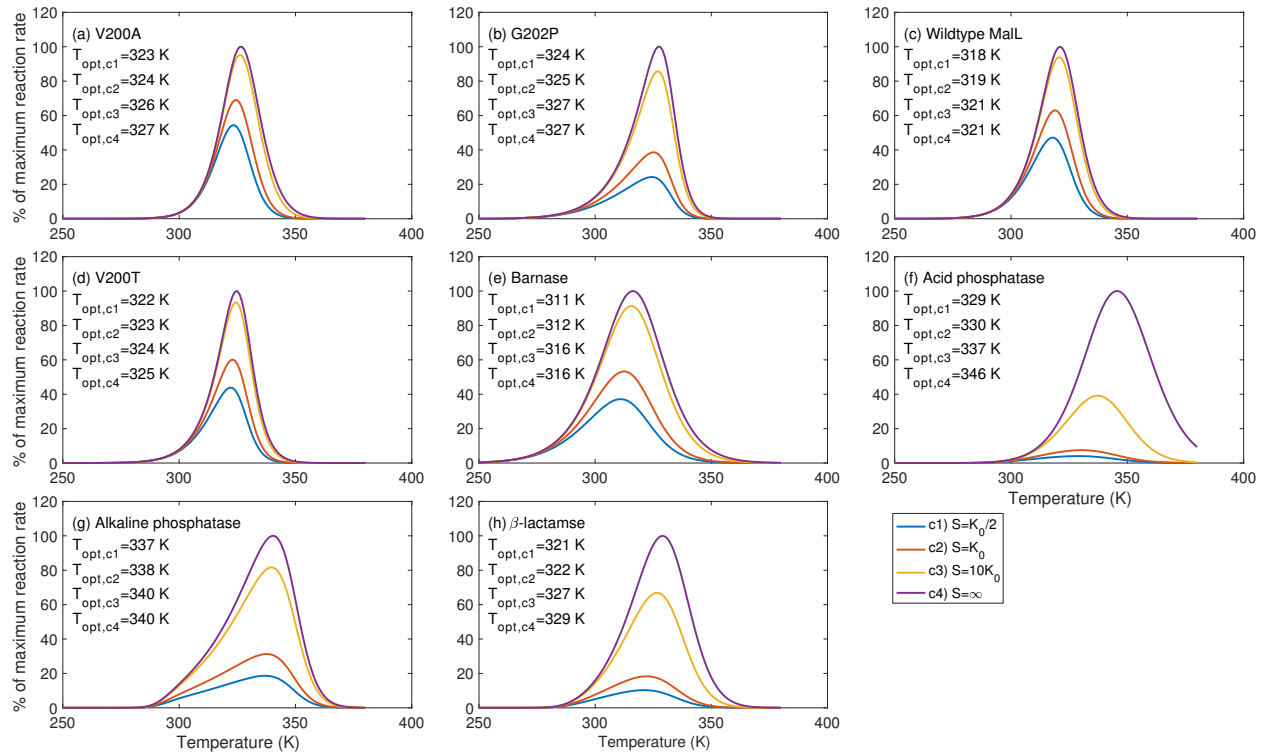

Figure S1. Substrate availability strongly affects the temperature sensitivity of the enzymatic reaction rates, as shown for the 8 example enzymes that are not shown in Figure 3 of the main text.
